# Supplementary material for: Boosting trace SO2adsorption and separation performance by the modulation of the SBU metal component of iron-based bimetal MOFs
Source: Royal Society of Chemistry journal article supplement (doi:10.1039/d3ta02223d), 2023-01-01
Supplement: d3ta02223d1.pdf [file d3ta02223d1.pdf]

## Boosting trace SO<sub>2</sub> adsorption and separation performance by the modulation of the SBU metal component of iron-based bimetal MOF

Jinze Yao,<sup>a†</sup> Zhiwei Zhao,<sup>b†</sup> Liang Yu,<sup>a</sup> Jiajin Huang,<sup>a</sup> Shigen Shen,<sup>a</sup> Siyao Zhao,<sup>a</sup> Ying Wu,<sup>c\*</sup> Xiangyang Tian,<sup>a</sup>

Jun Wang,<sup>b\*</sup> Qibin Xia<sup>a\*</sup>

<sup>a</sup> School of Chemistry and Chemical Engineering, South China University of Technology, Guangzhou 510640, P. R. China

<sup>b</sup> School of Chemistry and Chemical Engineering, Nanchang University, Nanchang, Jiangxi 330031, P.R China

<sup>c</sup> School of Chemical Engineering and Light Industry, Guangdong University of Technology, Guangzhou, Guangdong 510006, P. R. China.

† Jinze Yao and Zhiwei Zhao contributed equally to this work

### Materials

The Zinc nitrate hexahydrate [Zn(NO<sub>3</sub>)<sub>2</sub>·6H<sub>2</sub>O, 99.0%] were obtained from Aladdin Reagent (Shanghai) Co., LTD. The iron nitrate nonahydrate [Fe(NO<sub>3</sub>)<sub>3</sub>·9H<sub>2</sub>O, 98.5%], cobalt nitrate hexahydrate [Co(NO<sub>3</sub>)<sub>2</sub>·6H<sub>2</sub>O, 98.5%], nickel nitrate hexahydrate [Ni(NO<sub>3</sub>)<sub>2</sub>·6H<sub>2</sub>O, 98.5%] and manganese tetrahydrate nitrate [Mn(NO<sub>3</sub>)<sub>2</sub>·4H<sub>2</sub>O, 98.0%] were purchased from the Tianjin Damao Chemicals Co., Ltd. The organic ligand 3,3',5,5'-azobenzenetetracarboxylic acid (H<sub>4</sub>ABTC, 99.0%) was obtained from Shanghai Chemsoon Chemical Co., Ltd. Anhydrous sodium acetate (CH<sub>3</sub>COONa, 99.0%), ethanol (EtOH, 99.7%), dichloromethane (CH<sub>2</sub>Cl<sub>2</sub>,

---

\* Corresponding authors at:

<sup>1</sup> School of Chemistry and Chemical Engineering, South China University of Technology, Guangzhou 510640, PR China

<sup>2</sup> School of Chemistry and Chemical Engineering, Nanchang University, Nanchang, Jiangxi 330031, P.R China

<sup>3</sup> School of Chemical Engineering and Light Industry, Guangdong University of Technology, Guangzhou, Guangdong 510006, P. R. China.

E-mail: qbxia@scut.edu.cn (Q. B. Xia)<sup>1</sup>, jwang7@ncu.edu.cn (J. Wang), yingwu@gdut.edu.cn (Y. Wu)<sup>3</sup>

99.5%), N, N-dimethylformamide (DMF, 99.5%), methanol (MeOH, 99.5%), and glacial acetic acid (CH<sub>3</sub>COOH, 99.5%) were obtained from the Tianjin Damao Chemicals Co., Ltd. Ultrapure. Ultrahigh-purity-grade (>99.99%) N<sub>2</sub> and high-purity-grade (>99.95%) SO<sub>2</sub>, CO<sub>2</sub> and CH<sub>4</sub> gases were used during the adsorption experiments.

### **Synthesis of preformed metal clusters**

The Fe<sub>3</sub>(μ<sub>3</sub>-O)(CH<sub>3</sub>COO)<sub>6</sub> clusters were synthesized as literature reported with modifications<sup>1-3</sup>. Generally, dissolve iron nitrate nonahydrate (4.04 g, 0.01 mol) and sodium acetate (12.72 g, 0.155 mol) in 25 ml of deionized water, respectively. After that, the CH<sub>3</sub>COONa solution was dropwise added into the iron (III) nitrate solution under stirring. Brown precipitate could be obtained after stirring the mixed solution overnight. The product was filtrated and washed with EtOH, and then, dried at 343 K for 6 h under vacuum. For Fe<sub>2</sub>M(μ<sub>3</sub>-O)(CH<sub>3</sub>COO)<sub>6</sub> (M = Ni, Co, Zn, Mn), the preparation process was the same as Fe<sub>3</sub>(μ<sub>3</sub>-O)(CH<sub>3</sub>COO)<sub>6</sub> except that the M(II) (M = Co, Ni, Zn, Mn) nitrate (0.05 mol) was mixed with the iron(III) nitrate before dissolution.

### **Synthesis of PCN-250 series materials**

PCN-250 and bimetal PCN-250(Fe<sub>2</sub>M, M = Ni, Co, Zn, Mn) were synthesized as previously reported with minor modifications<sup>3</sup>. In a typical procedure, Fe<sub>3</sub>(μ<sub>3</sub>-O)(CH<sub>3</sub>COO)<sub>6</sub> clusters (15 mg), H<sub>4</sub>ABTC (10 mg), DMF (2 mL), and CH<sub>3</sub>COOH (1.4 mL) were added into a 23 ml Pyrex vial. The mixed solution was then heated in an oven for 12 h at 413 K. After slowly cooled to room temperature, the obtained brown crystal was filtrated and washed with DMF. The synthesis of bimetal PCN-250 (Fe<sub>2</sub>M, M = Co, Ni, Zn, Mn) was the same as the original PCN-250 material, except that corresponding Fe<sub>2</sub>M(μ<sub>3</sub>-O)(CH<sub>3</sub>COO)<sub>6</sub> (Fe<sub>2</sub>M, M = Ni, Co, Zn,

Mn) clusters were selected. Moreover, in the preparation of PCN-250(Fe<sub>2</sub>Mn), the amount of CH<sub>3</sub>COOH added was reduced to 1.1 mL.

### **Large-scale synthesis of PCN-250 series MOF**

PCN-250(Fe<sub>2</sub>M), M=Fe, Co, Ni, Mn, Zn were synthesized according to the reported literature, with some adjustments<sup>1</sup>. Fe<sub>3</sub>(μ<sub>3</sub>-O)(CH<sub>3</sub>COO)<sub>6</sub> clusters (1 g), H<sub>4</sub>ABTC (1 g), DMF (200 mL), and CH<sub>3</sub>COOH (140 mL) were added into a 500 mL Pyrex vial. The mixed solution was then heated in an oven for 12 h at 413 K. After slowly cooled to room temperature, the obtained brown crystal was filtrated and washed with DMF. The synthesis of bimetal PCN-250 (Fe<sub>2</sub>M, M = Co, Ni, Zn, Mn) was the same as the original PCN-250 material, except that corresponding Fe<sub>2</sub>M(μ<sub>3</sub>-O)(CH<sub>3</sub>COO)<sub>6</sub> (Fe<sub>2</sub>M, M = Ni, Co, Zn, Mn) clusters were selected. Moreover, in the preparation of PCN-250(Fe<sub>2</sub>Mn) and PCN-250(Fe<sub>2</sub>Zn), the amount of CH<sub>3</sub>COOH added was reduced to 120 mL and 100 mL, respectively.

### **Characterization Methods**

Powder X-ray diffraction (XRD) patterns were acquired on a Bruker D8 Advance X-ray diffractometer at 40 kV and 40 mA with a scan speed of 0.02°/s in the 2θ range of 5-50° using Cu-Kα radiation. Thermogravimetric analysis (TGA) was conducted under N<sub>2</sub> atmosphere at a heating rate of 10 °C/min from room temperature to 600 °C using a TGA-55 instrument. Scanning electron microscope (SEM) images were obtained on a TESCAN MIRA4 instrument. N<sub>2</sub> adsorption and desorption isotherms were measured at 77 K on ASAP 2460 Analyzer (Micromeritics) equipped with commercial software for calculation and analysis. The surface area was estimated by Brunauer-Emmett-Teller (BET) equation and the pore size distribution

was calculated based on the density functional theory (DFT) method.

### **Simulation methods**

To reveal the intrinsic mechanism for the superior separation behavior, computational modeling was conducted to investigate SO<sub>2</sub> and CO<sub>2</sub> adsorption in PCN-250 series materials. Adsorption density simulations were performed in the Sorption module, in which one molecule of each adsorbate was loaded (fixed loading) in 2 × 2 × 2 unit cell of the framework by means of the Metropolis Monte Carlo (MC) method at 298 K. This MC method sample an ensemble by generating a chain of configurations with the ensemble density. Exchange, conformers, rotate, translate and regrow trials of the adsorbate with probability of 0.39, 0.20, 0.20, 0.20, 0.02 were considered in each MC step. QEq method was used to calculate the partial charges of the adsorbate and adsorbent, in order to describe the electrostatic interactions with the Ewald summation method under an accuracy of 1×10<sup>-4</sup> kcal/mol. Van der Waals interactions between adsorbate and adsorbent were described by the universal force field, where the interactions were truncated at 15.5 Å. During the calculations, 1×10<sup>5</sup> steps were used for equilibration, and 1×10<sup>6</sup> steps were used for production. The charge density difference between the guest molecules and framework was derived from density functional theory (DFT) calculations taking the generalized gradient approximation (GGA) with a Perdew-Burke-Ernzerh (PBE) as the exchange-correlation functional with the CASTEP package. The guest molecules were isolated from the framework for the charge density difference calculation. The k-point was 3x3x3.

### Calculation of equilibrium selectivity

The SO<sub>2</sub>, CO<sub>2</sub>, CH<sub>4</sub> and N<sub>2</sub> adsorption isotherms were fitted by the dual site Langmuir-Freundlich (DSLFF) model. The DSLFF equation can be expressed as the follows:

$$q = q_1 \frac{b_1 p^{c_1}}{1 + b_1 p^{c_1}} + q_2 \frac{b_2 p^{c_2}}{1 + b_2 p^{c_2}} \quad (1)$$

where  $q$  (mmol/g) is the equilibrium adsorbed amount for an adsorbent,  $q_1$  and  $q_2$  (mmol/g) are the saturated adsorption capacities of site 1 and site 2,  $b_1$  and  $b_2$  are the affinity coefficients for sites 1 and 2,  $p$  (kPa) is the equilibrium pressure of the bulk gas, and  $c_1$  and  $c_2$  are the deviations from an ideal homogeneous surface. Both the pure component isotherms are well fitted by the model and the  $R^2$  values are larger than 0.995 (see Table S1). The adsorption selectivities  $S$  were determined by IAST calculations. IAST equation is given below:

$$S = \frac{q_1/q_2}{p_1/p_2} \quad (2)$$

where  $q_1$  and  $q_2$  are the adsorbed amounts of the adsorbed phase for component 1 and 2, respectively and  $p_1$  and  $p_2$  refer to the pressures in the gas phase for component 1 and 2, respectively.

**Calculation of isosteric heat of adsorption.** To evaluate the adsorption interactions between gas molecules and the MOF framework, as an important thermodynamic parameter, the isosteric heat of adsorption ( $Q_{st}$ ) was calculated by fitting SO<sub>2</sub>, CO<sub>2</sub>, CH<sub>4</sub> and N<sub>2</sub> sorption isotherms measured at 288, 298, and 308 K using the Virial equation.

$$\ln P = \ln N + \sum_{i=0}^m a_i N^i + \sum_{i=0}^n b_i N^i \quad (1)$$

where  $P$  is the pressure (bar);  $N$  is the amount adsorbed (mmol/g);  $T$  is the temperature (K);  $a_i$  and  $b_i$  are Virial coefficients;  $m$  and  $n$  determine the number of coefficients required to accurately describe the isotherms. Then, the values of the Virial coefficients  $a_0$  to  $a_m$  are employed to obtain the isosteric heat of adsorption from the following equation as a function of  $\text{SO}_2$ ,  $\text{CO}_2$ ,  $\text{CH}_4$  and  $\text{N}_2$  sorption amounts, respectively.

$$Q_{st} = -R \sum_{i=0}^m a_i N^i \quad (2)$$

where  $R$  is the gas constant [8.314 J/(K·mol)].

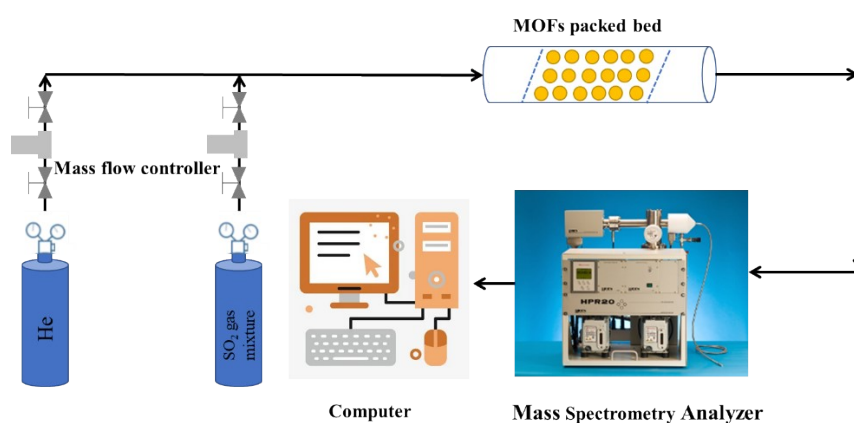

**Scheme. S1.** Schematic illustration of the homemade set-up used for the breakthrough experiments.

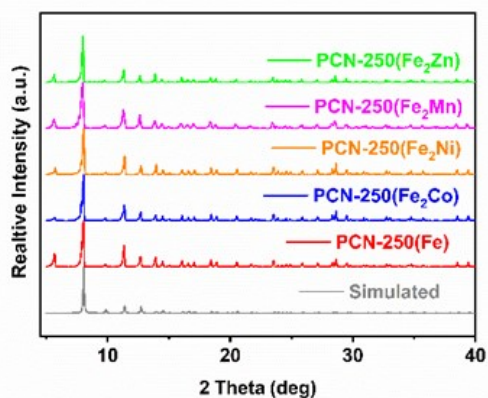

**Fig. S1** PXRD curves of PCN-250 series materials

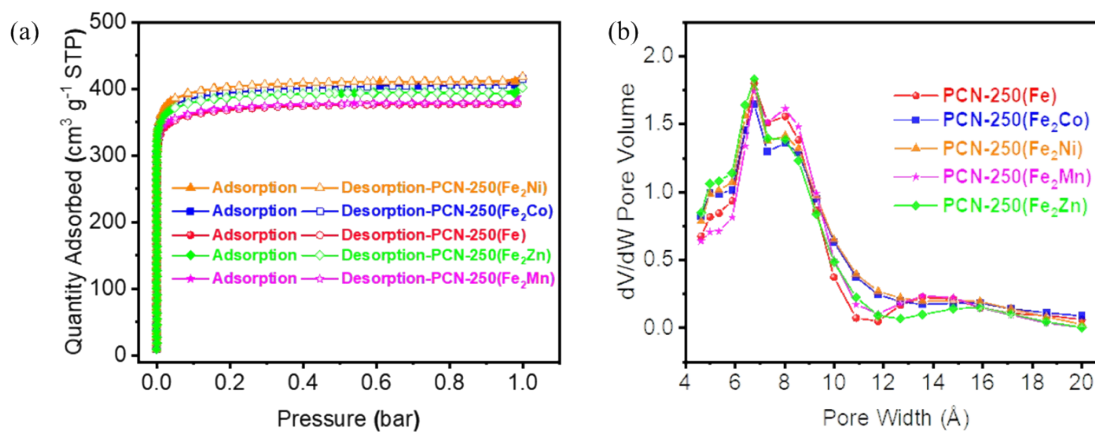

**Fig. S2** (a) N<sub>2</sub> adsorption-desorption isotherms at 77 K (b) pore size distribution of PCN-250 series materials

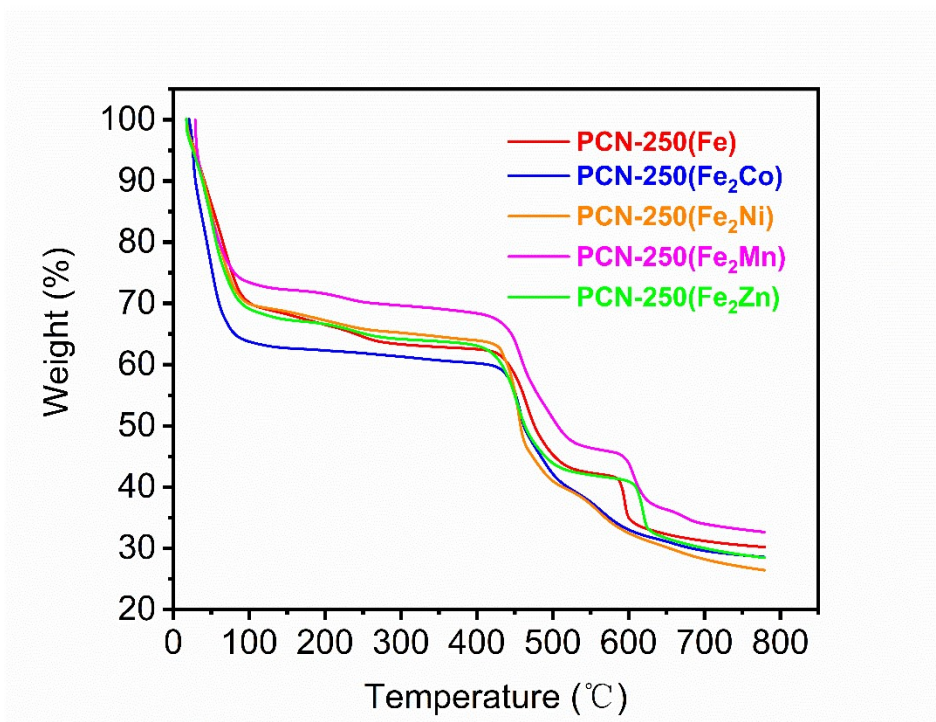

**Fig. S3** The TGA curve of PCN-250 series materials.

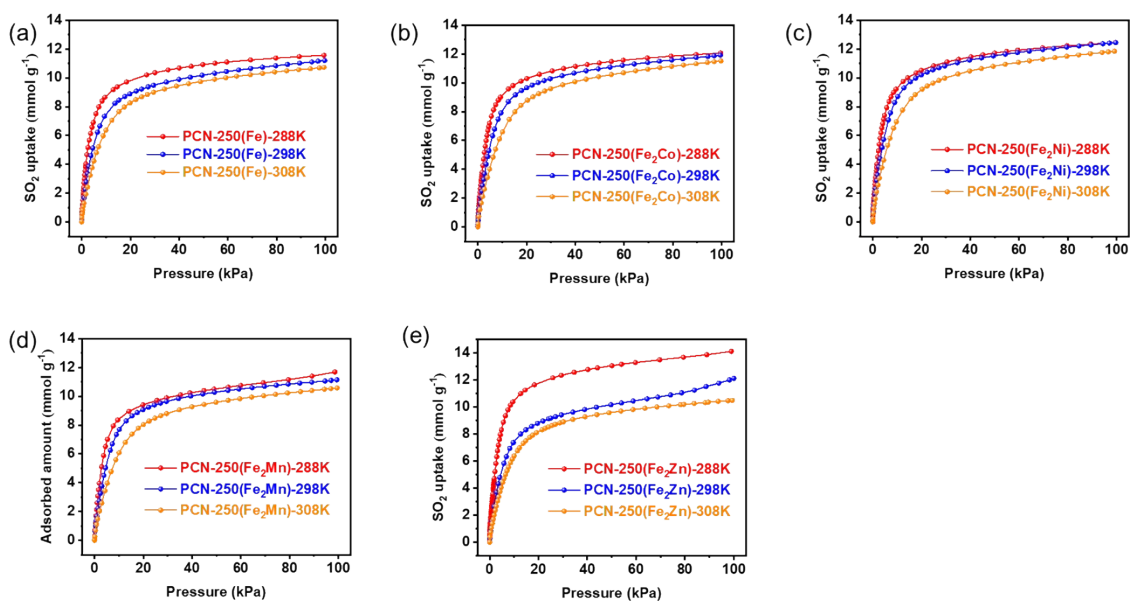

**Fig. S4** The SO<sub>2</sub> adsorption isotherms of PCN-250 series materials at 288, 298 and 308 K.

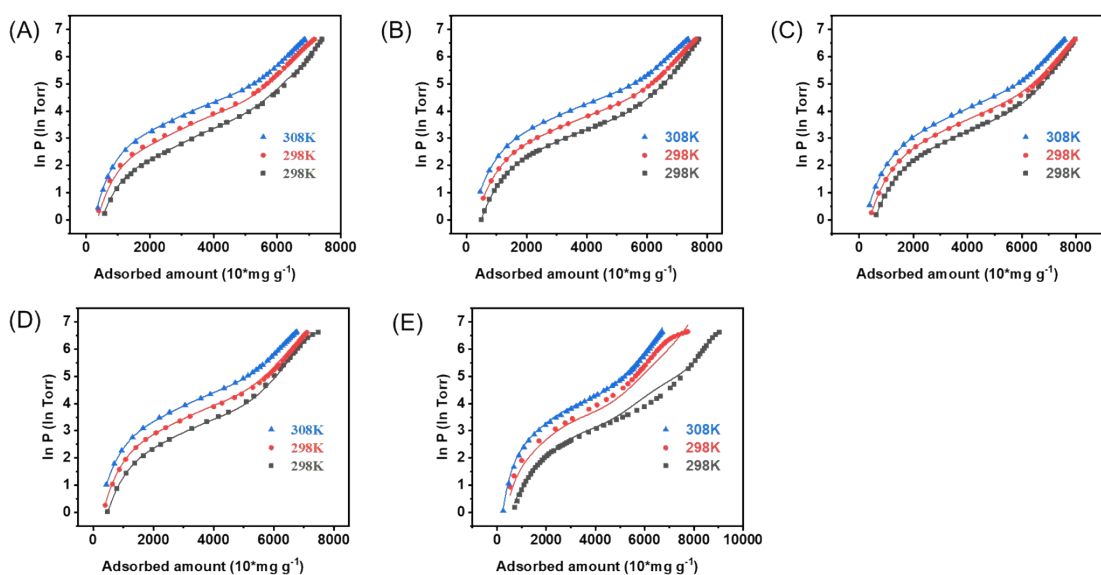

**Fig. S5** Virial fitting (lines) of SO<sub>2</sub> adsorption isotherms (points) of PCN-250 series materials measured at 288 K (blue), 298 K (red), and 308 K (black)



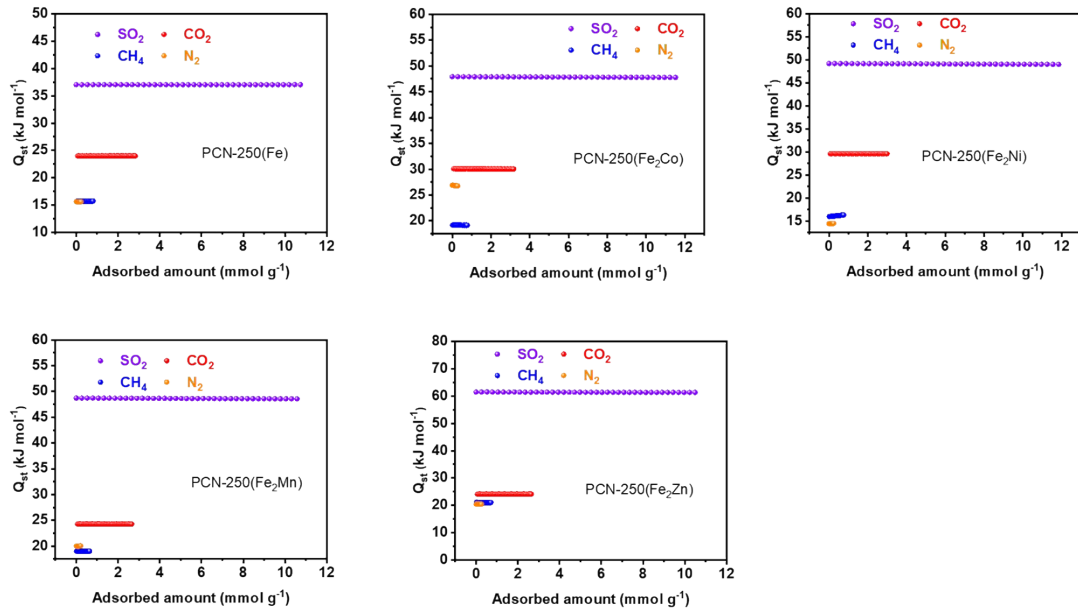

**Fig. S6** The isosteric heat of  $\text{SO}_2$ ,  $\text{CO}_2$ ,  $\text{CH}_4$  and  $\text{N}_2$  of five materials.

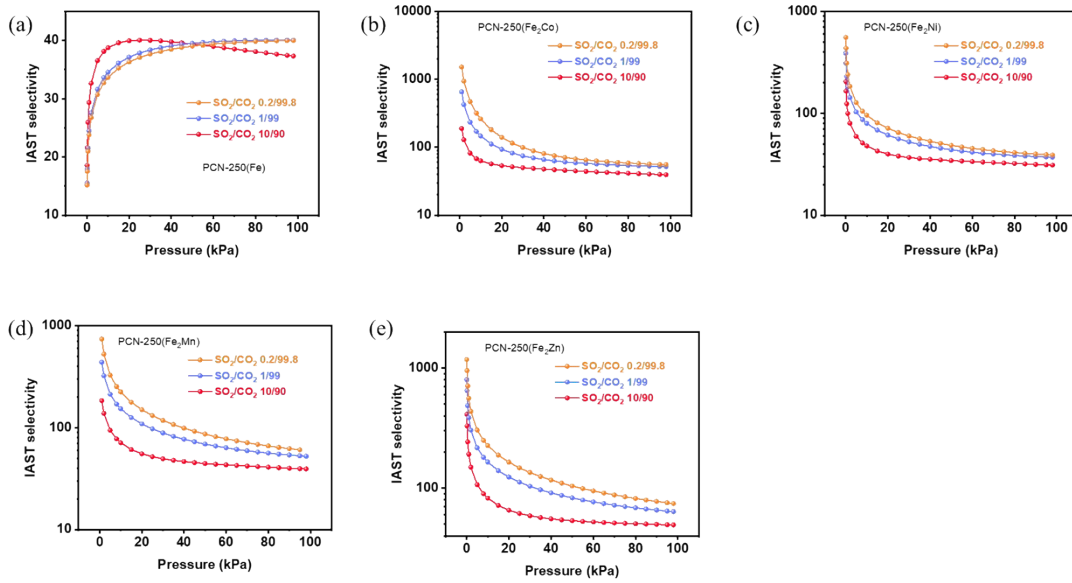

**Fig. S7** The ideal adsorption solution theory (IAST) selectivity of  $\text{SO}_2/\text{CO}_2$  (10:90, 1:99 and 0.2/99.8, v:v) mixtures of five PCN-250 materials.

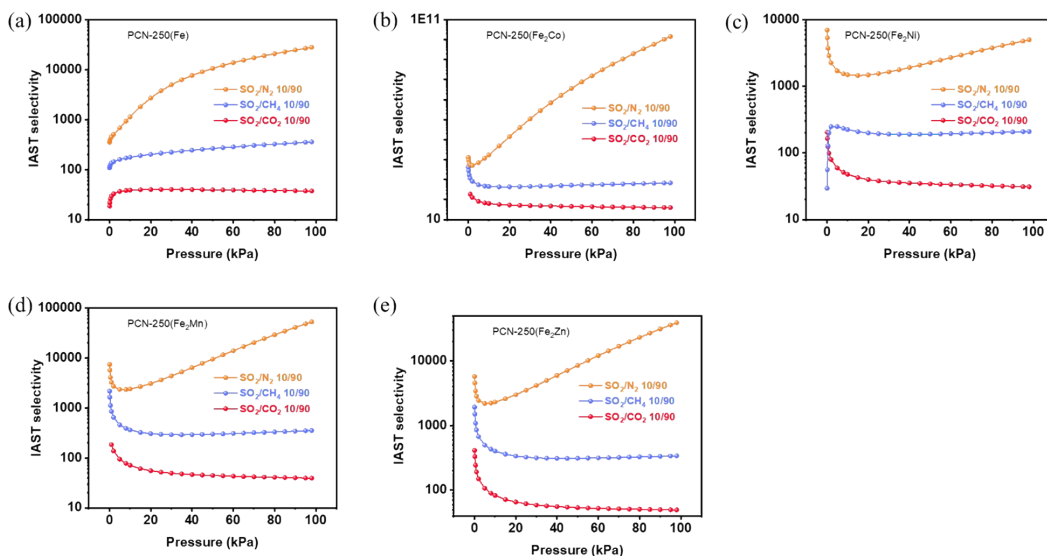

**Fig. S8** The ideal adsorption solution theory (IAST) selectivity of  $\text{SO}_2/\text{CO}_2$  (10:90, v:v),  $\text{SO}_2/\text{CH}_4$  (10:90, v:v) and  $\text{SO}_2/\text{N}_2$  (10:90, v:v) mixtures of five PCN-250 materials.

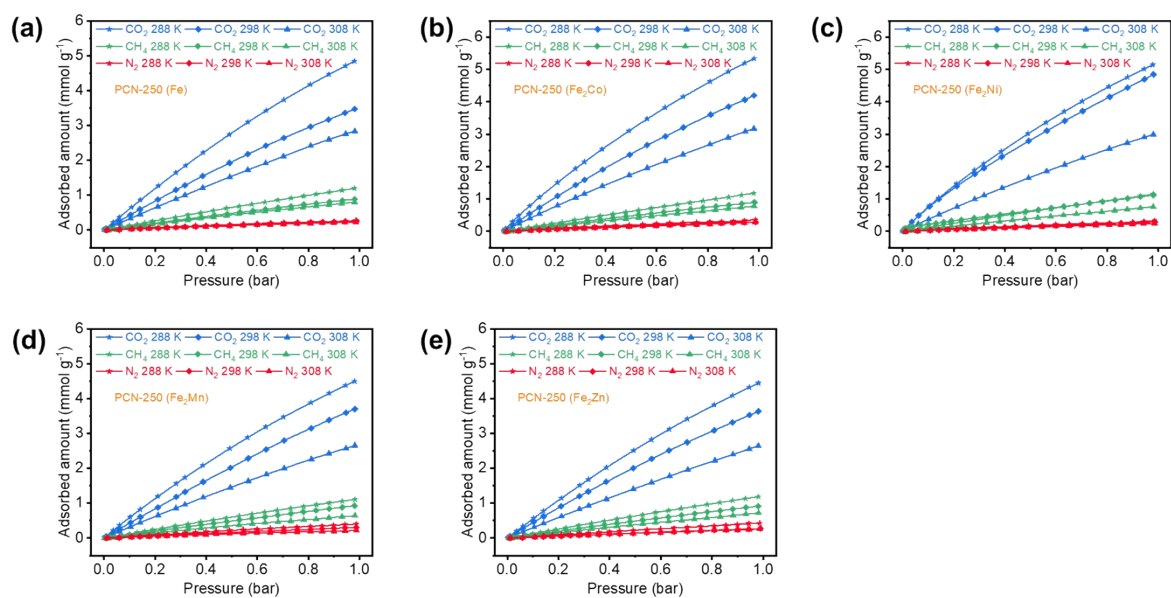

**Fig. S9** The  $\text{CO}_2$ ,  $\text{CH}_4$  and  $\text{N}_2$  adsorption isotherms of PCN-250 series materials at 288, 298 and 308 K.

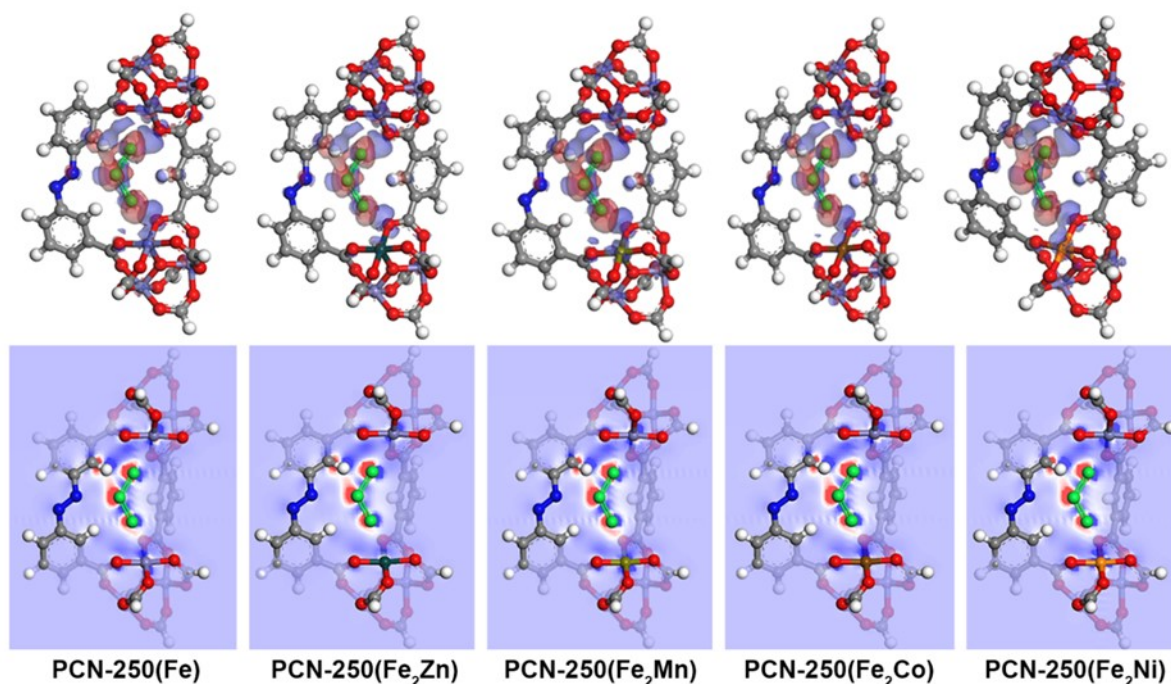

**Fig. S10** Charge density difference of SO<sub>2</sub>-adsorbed PCN-250 series materials. The electron density increases in the red region and decreases in the blue region.

**Table S1.** Pore textural parameters of PCN-250 series materials.

| Material                          | BET Surface areas (m <sup>2</sup> /g) | pore volume (cm <sup>3</sup> /g) |
|-----------------------------------|---------------------------------------|----------------------------------|
| <b>PCN-250 (Fe)</b>               | 1495                                  | 0.48                             |
| <b>PCN-250 (Fe<sub>2</sub>Co)</b> | 1583                                  | 0.51                             |
| <b>PCN-250 (Fe<sub>2</sub>Ni)</b> | 1621                                  | 0.52                             |
| <b>PCN-250 (Fe<sub>2</sub>Mn)</b> | 1483                                  | 0.47                             |
| <b>PCN-250 (Fe<sub>2</sub>Zn)</b> | 1560                                  | 0.50                             |

**Table S2.** Adsorption capacities of SO<sub>2</sub> and CO<sub>2</sub> on PCN-250 series materials and their capacity difference at 298 K and 100 kPa.

|                                                  | <b>PCN-250 (Fe)</b> | <b>PCN-250 (Fe<sub>2</sub>Co)</b> | <b>PCN-250 (Fe<sub>2</sub>Ni)</b> | <b>PCN-250 (Fe<sub>2</sub>Mn)</b> | <b>PCN-250 (Fe<sub>2</sub>Zn)</b> |
|--------------------------------------------------|---------------------|-----------------------------------|-----------------------------------|-----------------------------------|-----------------------------------|
| n(SO <sub>2</sub> ) (mmol/g)                     | 11.21               | 11.92                             | 12.44                             | 11.14                             | 12.11                             |
| n(CO <sub>2</sub> )(mmol/g)                      | 3.47                | 4.20                              | 4.84                              | 3.70                              | 3.63                              |
| n(SO <sub>2</sub> )-n(CO <sub>2</sub> ) (mmol/g) | 7.74                | 7.72                              | 7.6                               | 7.44                              | <b>8.48</b>                       |

**Table S3.** C<sub>2</sub>H<sub>6</sub> and C<sub>2</sub>H<sub>4</sub> fitting parameters of the Dual Site Langmuir-Freundlich model at 298 K of PCN-250 series materials.

|                                 |                 | q <sub>1</sub> | b <sub>1</sub> | c <sub>1</sub> | q <sub>2</sub> | b <sub>2</sub> | c <sub>2</sub> | R <sup>2</sup> |        |
|---------------------------------|-----------------|----------------|----------------|----------------|----------------|----------------|----------------|----------------|--------|
| PCN-250<br>(Fe)                 | SO <sub>2</sub> | 238            | 0.0000115      | 1.442          | 10.06          | 0.1935         | 1.124          | 0.9988         |        |
|                                 |                 |                | 3              |                |                |                |                |                |        |
|                                 | CO <sub>2</sub> | 5.77           | 0.0048         | 0.8276         | 9.339          | 0.001951       | 1.131          |                | 0.9999 |
|                                 | CH <sub>4</sub> | 5.402          | 0.001728       | 1.03           | 0.0291         | 0.000301       | 0.8626         |                | 0.9999 |
| PCN-250<br>(Fe <sub>2</sub> Co) | N <sub>2</sub>  | 0.7402         | 0.002413       | 1.131          | 2.741          | 0.0003515      | 0.7487         | 0.9999         |        |
|                                 | SO <sub>2</sub> | 5.899          | 0.2226         | 1.638          | 11.19          | 0.1177         | 0.4402         | 0.9999         |        |
|                                 | CO <sub>2</sub> | 10.97          | 0.001405       | 1.145          | 5.511          | 0.007013       | 0.9922         | 0.9999         |        |
|                                 | CH <sub>4</sub> | 5.545          | 0.001019       | 1.101          | 0.2866         | 0.01111        | 0.9235         | 0.9999         |        |
| PCN-250<br>(Fe <sub>2</sub> Ni) | N <sub>2</sub>  | 0.5148         | 0.002433       | 1.168          | 0.2398         | 0.005441       | 1.087          | 0.9999         |        |
|                                 | SO <sub>2</sub> | 9.655          | 0.2142         | 0.607          | 4.331          | 0.03105        | 2.173          | 0.9999         |        |
|                                 | CO <sub>2</sub> | 14.63          | 0.0001733      | 1.453          | 6.833          | 0.01357        | 0.8889         | 0.9999         |        |
|                                 | CH <sub>4</sub> | 2.584          | 0.0349         | 0.2813         | 7.506          | 0.0004891      | 1.203          | 0.9999         |        |
| PCN-250<br>(Fe <sub>2</sub> Mn) | N <sub>2</sub>  | 2.015          | 0.0003257      | 1.227          | 1.302          | 0.002062       | 0.8485         | 0.9999         |        |
|                                 | SO <sub>2</sub> | 8.979          | 0.2226         | 0.5976         | 4.097          | 0.03174        | 2.203          | 0.9999         |        |
|                                 | CO <sub>2</sub> | 6.405          | 0.002952       | 0.95           | 12.39          | 0.002101       | 1.033          | 0.9999         |        |
|                                 | CH <sub>4</sub> | 6.09           | 0.0009101      | 1.099          | 0.3756         | 0.01044        | 0.9128         | 0.9999         |        |
| PCN-250<br>(Fe <sub>2</sub> Zn) | N <sub>2</sub>  | 0.9807         | 0.001455       | 1.036          | 0.8739         | 0.00146        | 1.035          | 0.9998         |        |
|                                 | SO <sub>2</sub> | 10.4           | 0.2436         | 0.6572         | 3.692          | 0.02347        | 2.391          | 0.9999         |        |
|                                 | CO <sub>2</sub> | 8.726          | 0.001096       | 1.254          | 5.789          | 0.006193       | 0.8651         | 0.9999         |        |
|                                 | CH <sub>4</sub> | 7.772          | 0.0004577      | 1.16           | 0.639          | 0.009016       | 0.9333         | 0.9999         |        |
|                                 | N <sub>2</sub>  | 2.195          | 0.00139        | 1.032          | 0.1141         | 0.0001603      | 0.8728         | 0.9996         |        |

**Table S4.** Fitting parameters of the virial equation and the correlation coefficients.

|                                 |                 | $a_0$    | $a_1$    | $a_2$     | $a_3$     | $a_4$     | $b_0$    | $b_1$     | $R^2$  |
|---------------------------------|-----------------|----------|----------|-----------|-----------|-----------|----------|-----------|--------|
| PCN-250<br>(Fe)                 | SO <sub>2</sub> | -4451.88 | -0.0789  | 9.15E-05  | -2.35E-07 | 1.78E-10  | 8.35396  | 0.00252   | 0.9990 |
|                                 | CO <sub>2</sub> | -2887.59 | -0.26379 | 5.97E-04  | 1.99E-06  | -4.98E-09 | 8.71931  | 0.00146   | 0.9998 |
|                                 | CH <sub>4</sub> | -1890.78 | -6.2116  | 0.34315   | -0.00684  | 9.66E-05  | 7.96669  | 0.00753   | 0.9991 |
|                                 | N <sub>2</sub>  | -2887.59 | -0.26379 | 5.97E-04  | 1.99E-06  | -4.98E-09 | 8.71931  | 0.00146   | 0.9998 |
| PCN-250<br>(Fe <sub>2</sub> Co) | SO <sub>2</sub> | -5763.59 | 1.53815  | -2.74E-04 | -1.96E-07 | 1.25E-10  | 13.15723 | -0.00396  | 0.9999 |
|                                 | CO <sub>2</sub> | -3617.89 | 1.84872  | -0.00138  | -5.97E-07 | 1.18E-09  | 10.99595 | -0.00656  | 0.9999 |
|                                 | CH <sub>4</sub> | -2305.75 | 3.4099   | 1.08614   | -0.04257  | 7.63E-04  | 9.68059  | -0.07926  | 0.9989 |
|                                 | N <sub>2</sub>  | -3234.45 | 52.78926 | 7.15309   | -0.58973  | 0.01987   | 13.95964 | -0.48297  | 0.9957 |
| PCN-250<br>(Fe <sub>2</sub> Ni) | SO <sub>2</sub> | -5914.76 | 1.91113  | -4.53E-04 | -4.66E-08 | 4.64E-11  | 13.43236 | -0.00508  | 0.9990 |
|                                 | CO <sub>2</sub> | -3561.60 | 0.09322  | 0.0016    | -7.10E-06 | 1.32E-08  | 10.62477 | -5.36E-04 | 0.9940 |
|                                 | CH <sub>4</sub> | -1920.30 | -59.4937 | 3.35425   | -0.09201  | 0.00139   | 8.41475  | 0.01581   | 0.9079 |
|                                 | N <sub>2</sub>  | -1734.35 | -45.6261 | 6.73451   | -0.45254  | 0.01619   | 8.60903  | -0.04436  | 0.9991 |
| PCN-250<br>(Fe <sub>2</sub> Mn) | SO <sub>2</sub> | -5860.40 | 1.71088  | -5.34E-04 | -8.05E-08 | 1.05E-10  | 13.27391 | -0.00371  | 0.9988 |
|                                 | CO <sub>2</sub> | -2921.08 | 0.67034  | -0.00106  | -1.35E-06 | 4.34E-09  | 8.87314  | -0.00235  | 0.9998 |
|                                 | CH <sub>4</sub> | -2285.92 | -5.6696  | 0.87018   | -0.04114  | 8.37E-04  | 9.56874  | -0.03833  | 0.9980 |
|                                 | N <sub>2</sub>  | -2404.62 | -20.2806 | 4.17029   | -0.27104  | 0.00807   | 10.90747 | -0.11895  | 0.9984 |
| PCN-250<br>(Fe <sub>2</sub> Zn) | SO <sub>2</sub> | -7388.70 | 1.83262  | -0.00134  | 8.97E-07  | -3.40E-10 | 17.70812 | -0.00148  | 0.9913 |
|                                 | CO <sub>2</sub> | -2904.16 | 0.73193  | -0.00119  | -1.02E-06 | 3.81E-09  | 8.86684  | -0.00269  | 0.9989 |
|                                 | CH <sub>4</sub> | -2540.06 | 7.67859  | 0.56857   | -0.02737  | 5.02E-04  | 10.34157 | -0.07308  | 0.9992 |
|                                 | N <sub>2</sub>  | -2461.25 | 0.49594  | 4.50835   | -0.2705   | 0.00721   | 11.23868 | -0.21779  | 0.9927 |

**Table S5.** Summary of the adsorption capacities of SO<sub>2</sub> with different partial pressures of SO<sub>2</sub>, IAST selectivities of SO<sub>2</sub>/CO<sub>2</sub>, SO<sub>2</sub>/CH<sub>4</sub>, and SO<sub>2</sub>/N<sub>2</sub> on various materials.

| Materials                         | S <sub>BET</sub><br>(m <sup>2</sup> g <sup>-1</sup> ) | SO <sub>2</sub> uptake<br>(mmol g <sup>-1</sup> ) |                  | Selectivity                                                    | Selectivity                                                    | Selectivity                                                   | Ref.             |
|-----------------------------------|-------------------------------------------------------|---------------------------------------------------|------------------|----------------------------------------------------------------|----------------------------------------------------------------|---------------------------------------------------------------|------------------|
|                                   |                                                       | 0.1<br>bar                                        | 1.0<br>bar       | for<br>SO <sub>2</sub> /CO <sub>2</sub> at<br>10/90<br>mixture | for<br>SO <sub>2</sub> /CH <sub>4</sub> at<br>10/90<br>mixture | for<br>SO <sub>2</sub> /N <sub>2</sub> at<br>10/90<br>mixture |                  |
| <b>PCN-250 (Fe)</b>               | <b>1495</b>                                           | <b>7.93</b>                                       | <b>11.21</b>     | <b>37</b>                                                      | <b>356</b>                                                     | <b>&gt;1.0 × 10<sup>4</sup></b>                               |                  |
| <b>PCN-250 (Fe<sub>2</sub>Co)</b> | <b>1583</b>                                           | <b>8.06</b>                                       | <b>11.92</b>     | <b>39</b>                                                      | <b>667</b>                                                     | <b>&gt;1.0 × 10<sup>4</sup></b>                               |                  |
| <b>PCN-250 (Fe<sub>2</sub>Ni)</b> | <b>1619</b>                                           | <b>8.64</b>                                       | <b>12.45</b>     | <b>27</b>                                                      | <b>208</b>                                                     | <b>&gt;1.0 × 10<sup>4</sup></b>                               | <b>This work</b> |
| <b>PCN-250 (Fe<sub>2</sub>Mn)</b> | <b>1483</b>                                           | <b>7.7</b>                                        | <b>11.14</b>     | <b>39</b>                                                      | <b>351</b>                                                     | <b>&gt;1.0 × 10<sup>4</sup></b>                               |                  |
| <b>PCN-250 (Fe<sub>2</sub>Zn)</b> | <b>1560</b>                                           | <b>8.21</b>                                       | <b>12.11</b>     | <b>50</b>                                                      | <b>339</b>                                                     | <b>&gt;1.0 × 10<sup>4</sup></b>                               |                  |
| Cu-ATC                            | 600                                                   | 6.9                                               | 8.0              | 114                                                            | 750                                                            | >2.0 × 10 <sup>6</sup>                                        | 4                |
| HBU-20                            | 1551                                                  | 4.2                                               | 6.71             | 44.3                                                           | 280                                                            | -                                                             | 5                |
| DMOF                              | 1956                                                  | 7.21                                              | 13.09            | 35                                                             | -                                                              | -                                                             |                  |
| DMOF-M                            | 1557                                                  | 6.4                                               | 12.15            | 38                                                             | -                                                              | -                                                             | 6                |
| DMOF-DM                           | 1343                                                  | 5.7                                               | 10.40            | 40                                                             | -                                                              | -                                                             |                  |
| DMOF-TM                           | 900                                                   | 6.43                                              | 9.68             | 169                                                            | -                                                              | -                                                             |                  |
| SIFSIX-1-Cu                       | 1178                                                  | 8.74                                              | 11.01            | 70.7                                                           | 3145.7                                                         | 1241.4                                                        |                  |
| SIFSIX-2-Cu-i                     | 503                                                   | 6.01                                              | 6.9              | 87.1                                                           | 3103.2                                                         | 1017.1                                                        |                  |
| SIFSIX-2-Cu                       | 1881                                                  | -                                                 | 6.5              | -                                                              | -                                                              | -                                                             | 7                |
| SIFSIX-3-Zn                       | 250                                                   | 1.89                                              | 2.10             | -                                                              | 701.8                                                          | 371.6                                                         |                  |
| SIFSIX-3-Ni                       | 368                                                   | 2.55                                              | 2.74             | -                                                              | 506.7                                                          | 276.0                                                         |                  |
| ELM-12                            | 706                                                   | 1.95                                              | 2.73             | 30                                                             | 871                                                            | 4064                                                          | 8                |
| CPL-1                             | 335                                                   | 1                                                 | 2                | 8.1                                                            |                                                                |                                                               | 9                |
| MOF-808-His                       | 1054                                                  | 5.20                                              | 10.36            | 90.5                                                           | -                                                              | -                                                             | 10               |
| MFM-601                           | 3644                                                  | 5.0                                               | 12.3             | 32                                                             | 255                                                            | 50                                                            | 11               |
| MFM-170                           | 2408                                                  | 6.50                                              | 17.5             | 35                                                             | -                                                              | -                                                             | 12               |
| MFM-300(Al) <sup>b</sup>          |                                                       | 7.03 <sup>b</sup>                                 | 7.7 <sup>b</sup> |                                                                |                                                                |                                                               | 13               |
| MFM-300(In)                       | 1071                                                  | 7.20                                              | 8.28             | 50                                                             | 275                                                            | 2700                                                          | 14               |
| MFM-300(Sc)                       | 1360                                                  | 7.79                                              | 9.4              | 30                                                             | -                                                              | -                                                             | 15               |

|                              | S <sub>DET</sub> | SO <sub>2</sub> uptake  |                   | Selectivity      | Selectivity            | Selectivity            |    |
|------------------------------|------------------|-------------------------|-------------------|------------------|------------------------|------------------------|----|
|                              |                  | (mmol g <sup>-1</sup> ) |                   | for              | for                    | for                    |    |
| MFM-202a                     | 2220             | 3.0                     | 10.2              | -                | -                      | -                      | 16 |
| MFM-305                      | 779              | -                       | 6.99              | 160              | -                      | -                      | 17 |
| MFM-305-CH <sub>3</sub>      | 256              | -                       | 5.16              | 145              | -                      | -                      |    |
| MFM-520                      | 313              | -                       | 3.38              | 125 <sup>a</sup> | -                      | 20000 <sup>a</sup>     | 18 |
| NH <sub>2</sub> -MIL-125(Ti) | 1560             | 7.9 <sup>b</sup>        | 10.8 <sup>b</sup> | 42 <sup>b</sup>  | -                      | -                      |    |
| MIL-160                      | 1170             | 5.5 <sup>b</sup>        | 7.2 <sup>b</sup>  | 124 <sup>b</sup> | -                      | -                      | 19 |
| MOF-177                      |                  | 1 <sup>b</sup>          | 25 <sup>b</sup>   |                  |                        |                        |    |
| Ni(bdc)(ted) <sub>0.5</sub>  | 1783             | 4.54                    | 9.97              | -                | -                      | -                      | 20 |
| ECUT-77                      | 760              | 5.6                     | 8.0               | -                | -                      | -                      | 21 |
| ECUT-100                     | 688              | 3.3                     | 4.95              | -                | -                      | -                      | 22 |
| ECUT-111                     | 1493             | 6.4                     | 11.56             | 25.2(1/99)       | -                      | -                      | 23 |
| MIL-101(Cr)-4F               | 2176             | 4.6                     | 18.4              | -                | -                      | -                      | 24 |
| Ni-gallate                   | 455              | 3.79                    | 4.49              | 25               | >1.0 × 10 <sup>4</sup> | >1.0 × 10 <sup>4</sup> |    |
| Co-gallate                   | 494              | 4.51                    | 5.28              | 143              | >1.0 × 10 <sup>4</sup> | >1.0 × 10 <sup>4</sup> | 25 |
| Mg-gallate                   | 576              | 5.19                    | 5.81              | 321              | >1.0 × 10 <sup>4</sup> | >1.0 × 10 <sup>4</sup> |    |
| CAU-10                       | 630              | 3.9                     | 4.47              |                  | -                      | -                      | 26 |
| NU-200                       | 1260             | 8.5                     | 11.7              | 77               | -                      | -                      | 27 |
| Fe-soc-MOF                   | 1470             | 7.3                     | 11.7              | 30               | 580                    | -                      | 28 |
| NKU-100                      | 698              | 5                       | 6.71              | 940 <sup>a</sup> | -                      | >5000                  | 29 |
| CPL-1-NH <sub>2</sub>        | 180              | 1.7                     | 2.29              | 485              | -                      | -                      | 30 |
| Mn(INA) <sub>2</sub>         | 257              | 2.5                     | 3.4               | 62.3             | -                      | -                      | 31 |
| Zr-NU-907                    | 1090             | 2.0                     | 4.9               | -                | -                      | -                      |    |
| Ce <sub>5</sub> Zr-NU-907    | 730              | 2.2                     | 4.6               | -                | -                      | -                      | 32 |
| Th-NU-907                    | 610              | 3.4                     | 5.7               | -                | -                      | -                      |    |
| Zr-bptc                      | 960              | 6.2                     | 7.8               | 600 <sup>c</sup> | -                      | >5 000 <sup>c</sup>    |    |
| MFM-422                      | 3296             | -                       | 13.6              | -                | -                      | -                      | 33 |
| UiO-66-Cu <sup>II</sup>      | 1068             | 3.0                     | 8.2               | 54 <sup>c</sup>  | -                      | -                      |    |
| MFM-190(F)                   | 2538             | 6.9                     | 18.3              | 5.2 <sup>c</sup> | -                      | -                      | 34 |

a. Volume ratio of SO<sub>2</sub>:X mixture is 50:50; b. At a temperature of 293 K.; c. Volume ratio of SO<sub>2</sub>:X mixture is 1:99

## REFERENCES

1. D. Feng, K. Wang, Z. Wei, Y.-P. Chen, C. M. Simon, R. K. Arvapally, R. L. Martin, M. Bosch, T.-F. Liu, S. Fordham, D. Yuan, M. A. Omary, M. Haranczyk, B. Smit and H.-C. Zhou, *Nat. Commun.*, 2014, **5**, 5723.
2. Y. Chen, Z. Qiao, J. Huang, H. Wu, J. Xiao, Q. Xia, H. Xi, J. Hu, J. Zhou and Z. Li, *ACS Appl. Mater. Interfaces*, 2018, **10**, 38638-38647.
3. H. Wu, Y. Chen, Y. Yuan, D. Lv, S. Tu, Z. Liu, Z. Li and Q. Xia, *AIChE J.*, 2022, **68**, e17385.
4. Z. Zhu, K. Wu, X. Liu, P. Zhang, S. Chen, J. Chen, Q. Deng, Z. Zeng, S. Deng and J. Wang, *AIChE J.*, 2022, **68**, e17811.
5. Y.-B. Ren, H.-Y. Xu, S.-Q. Gang, Y.-J. Gao, X. Jing and J.-L. Du, *Chem. Eng. J.*, 2022, **431**, 134057.
6. S. Xing, J. Liang, P. Brandt, F. Schäfer, A. Nuhnen, T. Heinen, I. Boldog, J. Möllmer, M. Lange, O. Weingart and C. Janiak, *Angew. Chem., Int. Ed.*, 2021, **60**, 17998-18005.
7. X. Cui, Q. Yang, L. Yang, R. Krishna, Z. Zhang, Z. Bao, H. Wu, Q. Ren, W. Zhou, B. Chen and H. Xing, *Adv. Mater.*, 2017, **29**, 1606929.
8. Y. Zhang, Z. Chen, X. Liu, Z. Dong, P. Zhang, J. Wang, Q. Deng, Z. Zeng, S. Zhang and S. Deng, *Ind. Eng. Chem. Res.*, 2020, **59**, 874-882.
9. Y. Zhang, P. Zhang, W. Yu, J. Zhang, J. Huang, J. Wang, M. Xu, Q. Deng, Z. Zeng and S. Deng, *ACS Appl. Mater. Interfaces*, 2019, **11**, 10680-10688.
10. Z. Zhu, P. Zhang, B. Li, S. Chen, Q. Deng, Z. Zeng, J. Wang and S. Deng, *AIChE J.*, 2021, **67**, e17300.
11. J. H. Carter, X. Han, F. Y. Moreau, I. da Silva, A. Nevin, H. G. W. Godfrey, C. C. Tang, S. Yang and M. Schröder, *J. Am. Chem. Soc.*, 2018, **140**, 15564-15567.
12. G. L. Smith, J. E. Eyley, X. Han, X. Zhang, J. Li, N. M. Jacques, H. G. W. Godfrey, S. P. Argent, L. J. McCormick McPherson, S. J. Teat, Y. Cheng, M. D. Frogley, G. Cinque, S. J. Day, C. C. Tang, T. L. Easun, S. Rudić, A. J. Ramirez-Cuesta, S. Yang and M. Schröder, *Nat. Mater.*, 2019, **18**, 1358-1365.
13. S. Yang, J. Sun, A. J. Ramirez-Cuesta, S. K. Callear, W. I. F. David, D. P. Anderson, R. Newby, A. J. Blake, J. E. Parker, C. C. Tang and M. Schröder, *Nat. Chem.*, 2012, **4**, 887-894.
14. M. Savage, Y. Cheng, T. L. Easun, J. E. Eyley, S. P. Argent, M. R. Warren, W. Lewis, C. Murray, C. C. Tang, M. D. Frogley, G. Cinque, J. Sun, S. Rudić, R. T. Murden, M. J. Benham, A. N. Fitch, A. J. Blake, A. J. Ramirez-Cuesta, S. Yang and M. Schröder, *Adv. Mater.*, 2016, **28**, 8705-8711.
15. J. A. Zárate, E. Sánchez-González, D. R. Williams, E. González-Zamora, V. Martis, A. Martínez, J. Balmaseda, G. Maurin and I. A. Ibarra, *J. Mater. Chem. A*, 2019, **7**, 15580-15584.
16. S. Yang, L. Liu, J. Sun, K. M. Thomas, A. J. Davies, M. W. George, A. J. Blake, A. H. Hill, A. N. Fitch, C. C. Tang and M. Schröder, *J. Am. Chem. Soc.*, 2013, **135**, 4954-4957.
17. L. Li, I. da Silva, D. I. Kolokolov, X. Han, J. Li, G. Smith, Y. Cheng, L. L. Daemen, C. G. Morris, H. G. W. Godfrey, N. M. Jacques, X. Zhang, P. Manuel, M. D. Frogley, C. A. Murray, A. J. Ramirez-Cuesta, G. Cinque, C. C. Tang, A. G. Stepanov, S. Yang and M. Schroder, *Chem. Sci.*, 2019, **10**, 1472-1482.
18. J. Li, X. Han, X. Zhang, A. M. Sheveleva, Y. Cheng, F. Tuna, E. J. L. McInnes, L. J. McCormick McPherson, S. J. Teat, L. L. Daemen, A. J. Ramirez-Cuesta, M. Schröder and S. Yang, *Nat. Chem.*, 2019, **11**, 1085-1090.
19. P. Brandt, A. Nuhnen, M. Lange, J. Möllmer, O. Weingart and C. Janiak, *ACS Appl. Mater. Interfaces*,



- 2019, **11**, 17350-17358.
20. K. Tan, P. Canepa, Q. Gong, J. Liu, D. H. Johnson, A. Dyevoich, P. K. Thallapally, T. Thonhauser, J. Li and Y. J. Chabal, *Chem. Mater.*, 2013, **25**, 4653-4662.
  21. Y. L. Fan, H. P. Zhang, M. J. Yin, R. Krishna, X. F. Feng, L. Wang, M. B. Luo and F. Luo, *Inorg. Chem.*, 2021, **60**, 4-8.
  22. L. J. Guo, X. F. Feng, Z. Gao, R. Krishna and F. Luo, *Inorg. Chem.*, 2021, **60**, 1310-1314.
  23. M. J. Yin, X. H. Xiong, X. F. Feng, W. Y. Xu, R. Krishna and F. Luo, *Inorg. Chem.*, 2021, **60**, 3447-3451.
  24. E. Martínez-Ahumada, M. L. Díaz-Ramírez, H. A. Lara-García, D. R. Williams, V. Martis, V. Jancik, E. Lima and I. A. Ibarra, *J. Mater. Chem. A*, 2020, **8**, 11515-11520.
  25. F. Chen, D. Lai, L. Guo, J. Wang, P. Zhang, K. Wu, Z. Zhang, Q. Yang, Y. Yang, B. Chen, Q. Ren and Z. Bao, *J. Am. Chem. Soc.*, 2021, **143**, 9040-9047.
  26. J. A. Zárate, E. Domínguez-Ojeda, E. Sánchez-González, E. Martínez-Ahumada, V. B. López-Cervantes, D. R. Williams, V. Martis, I. A. Ibarra and J. Alejandro, *Dalton Transactions*, 2020, **49**, 9203-9207.
  27. W. Gong, Y. Xie, T. D. Pham, S. Shetty, F. A. Son, K. B. Idrees, Z. Chen, H. Xie, Y. Liu, R. Q. Snurr, B. Chen, B. Alameddine, Y. Cui and O. K. Farha, *J. Am. Chem. Soc.*, 2022, **144**, 3737-3745.
  28. Z. Chen, X. Wang, R. Cao, K. B. Idrees, X. Liu, M. C. Wasson and O. K. Farha, *ACS Mater. Lett.*, 2020, **2**, 1129-1134.
  29. Z. Han, J. Li, W. Lu, K. Wang, Y. Chen, X. Zhang, L. Lin, X. Han, S. J. Teat, M. D. Frogley, S. Yang, W. Shi and P. Cheng, *Angew. Chem., Int. Ed.*, 2022, **61**, e202115585.
  30. Z. Guo, Y. Li, P. Zhang, J. Cui, L. Chen, L. Yang, J. Wang, X. Cui and H. Xing, *Sep. Purif. Technol.*, 2022, **295**, 121337.
  31. Z. Guo, J. Cui, Y. Li, P. Zhang, L. Yang, L. Chen, J. Wang, X. Cui and H. Xing, *Ind. Eng. Chem. Res.*, 2022, **61**, 5936-5941.
  32. K. O. Kirlikovali, Z. Chen, X. Wang, M. R. Mian, S. Alayoglu, T. Islamoglu and O. K. Farha, *ACS Appl. Mater. Interfaces*, 2022, **14**, 3048-3056.
  33. J. Li, G. L. Smith, Y. Chen, Y. Ma, M. Kippax-Jones, M. Fan, W. Lu, M. D. Frogley, G. Cinque, S. J. Day, S. P. Thompson, Y. Cheng, L. L. Daemen, A. J. Ramirez-Cuesta, M. Schröder and S. Yang, *Angew. Chem., Int. Ed.*, 2022, **61**, e202207259.
  34. W. Li, J. Li, T. D. Duong, S. A. Sapchenko, X. Han, J. D. Humby, G. F. S. Whitehead, I. J. Victórica-Yrezábal, I. da Silva, P. Manuel, M. D. Frogley, G. Cinque, M. Schröder and S. Yang, *J. Am. Chem. Soc.*, 2022, **144**, 13196-13204.
